# Supplementary material for: WNT16B Is a New Marker of Cellular Senescence That Regulates p53 Activity and the Phosphoinositide 3-Kinase/AKT Pathway
Source: Oxford University Press journal article supplement (doi:10.1158/0008-5472.can-09-1016), 2009-12-01
Supplement: 00085472can091016-sup-tab_1.pdf [file 00085472can091016-sup-tab_1.pdf]

Table S1.

**A.** Complete list of 177 genes overexpressed in replicative senescence

| Value | Gene      | Description                                                                                                  | UniGene   | RefSeq    |
|-------|-----------|--------------------------------------------------------------------------------------------------------------|-----------|-----------|
| 2.440 | WNT16     | wingless-type MMTV integration site family, member 16 (WNT16), transcript variant 2, mRNA.                   | Hs.272375 | NM_016087 |
| 2.355 | MMP10     | matrix metalloproteinase 10 (stromelysin 2) (MMP10), mRNA.                                                   | Hs.2258   | NM_002425 |
| 2.344 | MMP3      | matrix metalloproteinase 3 (stromelysin 1, progelatinase) (MMP3), mRNA.                                      | Hs.375129 | NM_002422 |
| 2.300 | HIST1H2AC | Histone cluster 1, H2ac                                                                                      | Hs.484950 |           |
| 2.134 | CLDN1     | claudin 1 (CLDN1), mRNA.                                                                                     | Hs.439060 | NM_021101 |
| 2.119 | TSPAN13   | tetraspanin 13 (TSPAN13), mRNA.                                                                              | Hs.364544 | NM_014399 |
| 2.112 | HIST2H2BE | histone cluster 2, H2be (HIST2H2BE), mRNA.                                                                   | Hs.2178   | NM_003528 |
| 2.070 | HIST2H2BE | histone cluster 2, H2be (HIST2H2BE), mRNA.                                                                   | Hs.2178   | NM_003528 |
| 2.026 | DCBLD2    | discoidin, CUB and LCCL domain containing 2 (DCBLD2), mRNA.                                                  | Hs.203691 | NM_080927 |
| 2.007 | SERPINB2  | serpin peptidase inhibitor, clade B (ovalbumin), member 2 (SERPINB2), mRNA.                                  | Hs.594481 | NM_002575 |
| 2.004 | HIST2H2BE | histone cluster 2, H2be (HIST2H2BE), mRNA.                                                                   | Hs.2178   | NM_003528 |
| 1.989 | OBFC2A    | Oligonucleotide/oligosaccharide-binding fold containing 2A                                                   | Hs.591610 |           |
| 1.962 | HIST2H2BE | histone cluster 2, H2be (HIST2H2BE), mRNA.                                                                   | Hs.2178   | NM_003528 |
| 1.947 | PLCB4     | phospholipase C, beta 4 (PLCB4), transcript variant 2, mRNA.                                                 | Hs.472101 | NM_182797 |
| 1.934 | PLCB4     | phospholipase C, beta 4 (PLCB4), transcript variant 1, mRNA.                                                 | Hs.472101 | NM_000933 |
| 1.933 | KRTAP1-5  | keratin associated protein 1-5 (KRTAP1-5), mRNA.                                                             | Hs.534499 | NM_031957 |
| 1.894 | HIST2H2BE | histone cluster 2, H2be (HIST2H2BE), mRNA.                                                                   | Hs.2178   | NM_003528 |
| 1.884 | CYTL1     | cytokine-like 1 (CYTL1), mRNA.                                                                               | Hs.13872  | NM_018659 |
| 1.848 | TNFRSF10D | tumor necrosis factor receptor superfamily, member 10d, decoy with truncated death domain (TNFRSF10D), mRNA. | Hs.213467 | NM_003840 |
| 1.785 | MMP1      | matrix metalloproteinase 1 (interstitial collagenase) (MMP1), mRNA.                                          | Hs.83169  | NM_002421 |
| 1.781 | P2RX5     | purinergic receptor P2X, ligand-gated ion channel, 5 (P2RX5), transcript variant 2, mRNA.                    | Hs.408615 | NM_175080 |
| 1.775 | ARRDC4    | arrestin domain containing 4 (ARRDC4), mRNA.                                                                 | Hs.6093   | NM_183376 |
| 1.738 | CCND2     | cyclin D2 (CCND2), mRNA.                                                                                     | Hs.376071 | NM_001759 |
| 1.737 | CDKN1A    | cyclin-dependent kinase inhibitor 1A (p21, Cip1) (CDKN1A), transcript variant 1, mRNA.                       | Hs.370771 | NM_000389 |
| 1.716 | AOX1      | aldehyde oxidase 1 (AOX1), mRNA.                                                                             | Hs.406238 | NM_001159 |

|       |           |                                                                                                                                |           |              |
|-------|-----------|--------------------------------------------------------------------------------------------------------------------------------|-----------|--------------|
| 1.713 | WDR63     | WD repeat domain 63 (WDR63), mRNA.                                                                                             | Hs.97933  | NM_145172    |
| 1.711 | HIST2H2BE | histone cluster 2, H2be (HIST2H2BE), mRNA.                                                                                     | Hs.2178   | NM_003528    |
| 1.692 | HIST2H2BE | histone cluster 2, H2be (HIST2H2BE), mRNA.                                                                                     | Hs.2178   | NM_003528    |
| 1.685 | LPXN      | leupaxin (LPXN), mRNA.                                                                                                         | Hs.125474 | NM_004811    |
| 1.658 | HIST2H2BE | histone cluster 2, H2be (HIST2H2BE), mRNA.                                                                                     | Hs.2178   | NM_003528    |
| 1.640 | GLS       | glutaminase (GLS), nuclear gene encoding mitochondrial protein, mRNA.                                                          | Hs.116448 | NM_014905    |
| 1.599 | C15orf48  | chromosome 15 open reading frame 48 (C15orf48), transcript variant 1, mRNA.                                                    | Hs.112242 | NM_197955    |
| 1.591 | HIST2H2BE | histone cluster 2, H2be (HIST2H2BE), mRNA.                                                                                     | Hs.2178   | NM_003528    |
| 1.574 | PNPLA3    | patatin-like phospholipase domain containing 3 (PNPLA3), mRNA.                                                                 | Hs.654800 | NM_025225    |
| 1.569 | HIST2H2BE | histone cluster 2, H2be (HIST2H2BE), mRNA.                                                                                     | Hs.2178   | NM_003528    |
| 1.568 | FUT7      | fucosyltransferase 7 (alpha (1,3) fucosyltransferase) (FUT7), mRNA.                                                            | Hs.457    | NM_004479    |
| 1.567 | RRM2B     | ribonucleotide reductase M2 B (TP53 inducible) (RRM2B), mRNA.                                                                  | Hs.512592 | NM_015713    |
| 1.563 | FYN       | FYN oncogene related to SRC, FGR, YES (FYN), transcript variant 2, mRNA.                                                       | Hs.390567 | NM_153047    |
| 1.548 | PKIB      | protein kinase (cAMP-dependent, catalytic) inhibitor beta (PKIB), transcript variant 3, mRNA.                                  | Hs.486354 | NM_032471    |
| 1.534 | LEPREL1   | leprecan-like 1 (LEPREL1), mRNA.                                                                                               | Hs.374191 | NM_018192    |
| 1.527 | CHI3L1    | chitinase 3-like 1 (cartilage glycoprotein-39) (CHI3L1), mRNA.                                                                 | Hs.382202 | NM_001276    |
| 1.526 | HMGA2     | high mobility group AT-hook 2 (HMGA2), transcript variant 1, mRNA.                                                             | Hs.505924 | NM_003483    |
| 1.514 | MAMDC2    | MAM domain containing 2 (MAMDC2), mRNA.                                                                                        | Hs.547172 | NM_153267    |
| 1.510 | NEK10     | NIMA (never in mitosis gene a)- related kinase 10 (NEK10), transcript variant 1, mRNA.                                         | Hs.506115 | NM_001031741 |
| 1.506 | TRIM58    | tripartite motif-containing 58 (TRIM58), mRNA.                                                                                 | Hs.323858 | NM_015431    |
| 1.500 | HIST2H2BE | histone cluster 2, H2be (HIST2H2BE), mRNA.                                                                                     | Hs.2178   | NM_003528    |
| 1.498 | HIST2H2BE | histone cluster 2, H2be (HIST2H2BE), mRNA.                                                                                     | Hs.2178   | NM_003528    |
| 1.493 | CYB5R1    | cytochrome b5 reductase 1 (CYB5R1), mRNA.                                                                                      | Hs.334832 | NM_016243    |
| 1.487 | TMEM154   | transmembrane protein 154 (TMEM154), mRNA.                                                                                     | Hs.518900 | NM_152680    |
| 1.468 | TNFRSF10B | tumor necrosis factor receptor superfamily, member 10b (TNFRSF10B), transcript variant 2, mRNA.                                | Hs.521456 | NM_147187    |
| 1.466 | HIST1H4H  | histone cluster 1, H4h (HIST1H4H), mRNA.                                                                                       | Hs.591790 | NM_003543    |
| 1.465 | STC1      | stanniocalcin 1 (STC1), mRNA.                                                                                                  | Hs.25590  | NM_003155    |
| 1.464 | KCNN2     | potassium intermediate/small conductance calcium-activated channel, subfamily N, member 2 (KCNN2), transcript variant 2, mRNA. | Hs.98280  | NM_170775    |
| 1.458 | HIST2H2BE | histone cluster 2, H2be (HIST2H2BE), mRNA.                                                                                     | Hs.2178   | NM_003528    |
| 1.439 | SMURF2    | SMAD specific E3 ubiquitin protein ligase 2 (SMURF2), mRNA.                                                                    | Hs.705442 | NM_022739    |
| 1.439 | SLC16A6   | solute carrier family 16, member 6 (monocarboxylic acid transporter 7) (SLC16A6), mRNA.                                        | Hs.42645  | NM_004694    |
| 1.429 | INA       | internexin neuronal intermediate filament protein, alpha (INA), mRNA.                                                          | Hs.500916 | NM_032727    |

|       |           |                                                                                                                  |           |              |
|-------|-----------|------------------------------------------------------------------------------------------------------------------|-----------|--------------|
| 1.427 | PTX3      | pentraxin-related gene, rapidly induced by IL-1 beta (PTX3), mRNA.                                               | Hs.591286 | NM_002852    |
| 1.424 | HIST1H1C  | histone cluster 1, H1c (HIST1H1C), mRNA.                                                                         | Hs.7644   | NM_005319    |
| 1.423 | IGFBP7    | insulin-like growth factor binding protein 7 (IGFBP7), mRNA.                                                     | Hs.479808 | NM_001553    |
| 1.412 | ITGA6     | Integrin, alpha 6                                                                                                | Hs.133397 |              |
| 1.407 |           | CDNA FLJ12136 fis, clone MAMMA1000312                                                                            | Hs.655291 |              |
| 1.395 | SFRP1     | secreted frizzled-related protein 1 (SFRP1), mRNA.                                                               | Hs.708003 | NM_003012    |
| 1.393 | PERP      | PERP, TP53 apoptosis effector (PERP), mRNA.                                                                      | Hs.520421 | NM_022121    |
| 1.378 | LOC654433 | CDNA clone IMAGE:4826696                                                                                         | Hs.656660 |              |
| 1.371 | GALNT5    | UDP-N-acetyl-alpha-D-galactosamine:polypeptide N-acetylgalactosaminyltransferase 5 (GalNAc-T5) (GALNT5), mRNA.   | Hs.269027 | NM_014568    |
| 1.347 | TNFRSF10C | tumor necrosis factor receptor superfamily, member 10c, decoy without an intracellular domain (TNFRSF10C), mRNA. | Hs.655801 | NM_003841    |
| 1.329 | NFE2L3    | nuclear factor (erythroid-derived 2)-like 3 (NFE2L3), mRNA.                                                      | Hs.404741 | NM_004289    |
| 1.327 | AKAP2     | A kinase (PRKA) anchor protein 2 (AKAP2), mRNA.                                                                  | Hs.591908 | NM_001004065 |
| 1.324 | P11       | 22 serine protease placental protein 11                                                                          | Hs.997    |              |
| 1.322 | NRG1      | neuregulin 1 (NRG1), transcript variant HRG-beta2, mRNA.                                                         | Hs.453951 | NM_013957    |
| 1.322 | SERPINB7  | serpin peptidase inhibitor, clade B (ovalbumin), member 7 (SERPINB7), transcript variant 2, mRNA.                | Hs.138202 | NM_001040147 |
| 1.320 | AK3L1     | Adenylate kinase 3-like 1                                                                                        | Hs.592601 |              |
| 1.317 | BRP44     | brain protein 44 (BRP44), mRNA.                                                                                  | Hs.517768 | NM_015415    |
| 1.316 | MCTP2     | Multiple C2 domains, transmembrane 2                                                                             | Hs.592017 |              |
| 1.307 | SERPINI1  | serpin peptidase inhibitor, clade I (neuroserpin), member 1 (SERPINI1), mRNA.                                    | Hs.478153 | NM_005025    |
| 1.287 | CLGN      | calmegin (CLGN), mRNA.                                                                                           | Hs.86368  | NM_004362    |
| 1.285 | IGF2BP3   | insulin-like growth factor 2 mRNA binding protein 3 (IGF2BP3), mRNA.                                             | Hs.700696 | NM_006547    |
| 1.277 | DYNLT3    | dynein, light chain, Tctex-type 3 (DYNLT3), mRNA.                                                                | Hs.446392 | NM_006520    |
| 1.277 | FBXL2     | F-box and leucine-rich repeat protein 2 (FBXL2), mRNA.                                                           | Hs.475872 | NM_012157    |
| 1.270 | TMEM47    | transmembrane protein 47 (TMEM47), mRNA.                                                                         | Hs.8769   | NM_031442    |
| 1.264 | UACA      | uveal autoantigen with coiled-coil domains and ankyrin repeats (UACA), transcript variant 1, mRNA.               | Hs.108049 | NM_018003    |
| 1.261 | FLJ11151  | hypothetical protein FLJ11151 (FLJ11151), transcript variant 2, mRNA.                                            | Hs.460002 | NM_001099455 |
| 1.259 | WNT5B     | wingless-type MMTV integration site family, member 5B (WNT5B), transcript variant 2, mRNA.                       | Hs.306051 | NM_030775    |
| 1.257 | GDF15     | growth differentiation factor 15 (GDF15), mRNA.                                                                  | Hs.616962 | NM_004864    |
| 1.247 | DRP2      | dystrophin related protein 2 (DRP2), mRNA.                                                                       | Hs.159291 | NM_001939    |
| 1.242 | HIST1H2BM | histone cluster 1, H2bm (HIST1H2BM), mRNA.                                                                       | Hs.182432 | NM_003521    |
| 1.240 | APLP1     | amyloid beta (A4) precursor-like protein 1 (APLP1), transcript variant 2, mRNA.                                  | Hs.74565  | NM_005166    |
| 1.235 | TOP1MT    | topoisomerase (DNA) I, mitochondrial (TOP1MT), nuclear gene encoding mitochondrial protein, mRNA.                | Hs.528574 | NM_052963    |

|       |           |                                                                                                       |           |              |
|-------|-----------|-------------------------------------------------------------------------------------------------------|-----------|--------------|
| 1.233 | PCYOX1    | prenylcysteine oxidase 1 (PCYOX1), mRNA.                                                              | Hs.591572 | NM_016297    |
| 1.232 | KIAA1370  | KIAA1370 (KIAA1370), mRNA.                                                                            | Hs.152385 | NM_019600    |
| 1.230 | SMURF2    | SMAD specific E3 ubiquitin protein ligase 2                                                           | Hs.705442 |              |
| 1.220 | SAT1      | spermidine/spermine N1-acetyltransferase 1 (SAT1), mRNA.                                              | Hs.28491  | NM_002970    |
| 1.220 | PTPRK     | protein tyrosine phosphatase, receptor type, K (PTPRK), mRNA.                                         | Hs.155919 | NM_002844    |
| 1.219 | DLX2      | distal-less homeobox 2 (DLX2), mRNA.                                                                  | Hs.419    | NM_004405    |
| 1.214 | SC4MOL    | sterol-C4-methyl oxidase-like (SC4MOL), transcript variant 2, mRNA.                                   | Hs.105269 | NM_001017369 |
| 1.214 | SIN3B     | SIN3 homolog B, transcription regulator (yeast) (SIN3B), mRNA.                                        | Hs.13999  | NM_015260    |
| 1.205 | LOC554202 | Hypothetical LOC554202, mRNA (cDNA clone MGC:30053 IMAGE:5139119)                                     | Hs.458096 |              |
| 1.191 | PRSS23    | protease, serine, 23 (PRSS23), mRNA.                                                                  | Hs.25338  | NM_007173    |
| 1.176 | NPAL3     | NIPA-like domain containing 3 (NPAL3), mRNA.                                                          | Hs.523442 | NM_020448    |
| 1.173 | LPIN1     | lipin 1 (LPIN1), mRNA.                                                                                | Hs.467740 | NM_145693    |
| 1.173 | NAV3      | Neuron navigator 3                                                                                    | Hs.655301 |              |
| 1.163 | COBLL1    | COBL-like 1 (COBLL1), mRNA.                                                                           | Hs.470457 | NM_014900    |
| 1.156 | RAC2      | ras-related C3 botulinum toxin substrate 2 (rho family, small GTP binding protein Rac2) (RAC2), mRNA. | Hs.517601 | NM_002872    |
| 1.154 | NT5E      | 5'-nucleotidase, ecto (CD73) (NT5E), mRNA.                                                            | Hs.153952 | NM_002526    |
| 1.154 | PINK1     | PTEN induced putative kinase 1 (PINK1), nuclear gene encoding mitochondrial protein, mRNA.            | Hs.389171 | NM_032409    |
| 1.148 | CPA4      | carboxypeptidase A4 (CPA4), mRNA.                                                                     | Hs.93764  | NM_016352    |
| 1.146 | TRIM22    | tripartite motif-containing 22 (TRIM22), mRNA.                                                        | Hs.501778 | NM_006074    |
| 1.142 | LOC728285 | PREDICTED: similar to keratin associated protein (LOC728285), mRNA.                                   |           | XM_001127070 |
| 1.140 | DAPK1     | death-associated protein kinase 1 (DAPK1), mRNA.                                                      | Hs.380277 | NM_004938    |
| 1.140 | CTSL1     | cathepsin L1 (CTSL1), transcript variant 2, mRNA.                                                     | Hs.418123 | NM_145918    |
| 1.137 | LOC654433 | CDNA clone IMAGE:4826696                                                                              | Hs.656660 |              |
| 1.137 | LRRN3     | leucine rich repeat neuronal 3 (LRRN3), transcript variant 3, mRNA.                                   | Hs.3781   | NM_018334    |
| 1.128 | IL13RA2   | interleukin 13 receptor, alpha 2 (IL13RA2), mRNA.                                                     | Hs.336046 | NM_000640    |
| 1.126 | SEMA7A    | semaphorin 7A, GPI membrane anchor (John Milton Hagen blood group) (SEMA7A), mRNA.                    | Hs.24640  | NM_003612    |
| 1.125 |           | CDNA FLJ39162 fis, clone OCBBF2002376                                                                 | Hs.283851 |              |
| 1.113 | TAC3      | tachykinin 3 (neuromedin K, neurokinin beta) (TAC3), transcript variant 2, mRNA.                      | Hs.9730   | NM_013251    |
| 1.112 | CNIH3     | cornichon homolog 3 (Drosophila) (CNIH3), mRNA.                                                       | Hs.28659  | NM_152495    |
| 1.111 | UBE2Q1    | ubiquitin-conjugating enzyme E2Q (putative) 1 (UBE2Q1), mRNA.                                         | Hs.607928 | NM_017582    |
| 1.106 | IL1R2     | interleukin 1 receptor, type II (IL1R2), transcript variant 2, mRNA.                                  | Hs.25333  | NM_173343    |
| 1.104 | AHNAK2    | AHNAK nucleoprotein 2 (AHNAK2), mRNA.                                                                 | Hs.708330 | NM_138420    |
| 1.102 | CYP3A4    | cytochrome P450, family 3, subfamily A, polypeptide 4 (CYP3A4), mRNA.                                 | Hs.654391 | NM_017460    |

|       |               |                                                                                                                 |           |              |
|-------|---------------|-----------------------------------------------------------------------------------------------------------------|-----------|--------------|
| 1.101 | AK3L1         | Adenylate kinase 3-like 1                                                                                       | Hs.10862  |              |
| 1.098 | SLC20A1       | solute carrier family 20 (phosphate transporter), member 1 (SLC20A1), mRNA.                                     | Hs.187946 | NM_005415    |
| 1.092 | hCG_1776018   | Hypothetical protein LOC644139                                                                                  | Hs.553909 |              |
| 1.092 | SCG2          | secretogranin II (chromogranin C) (SCG2), mRNA.                                                                 | Hs.516726 | NM_003469    |
| 1.082 | IL18          | interleukin 18 (interferon-gamma-inducing factor) (IL18), mRNA.                                                 | Hs.83077  | NM_001562    |
| 1.081 | AKR1B1        | aldo-keto reductase family 1, member B1 (aldose reductase) (AKR1B1), mRNA.                                      | Hs.521212 | NM_001628    |
| 1.077 | MCFD2         | multiple coagulation factor deficiency 2 (MCFD2), mRNA.                                                         | Hs.293689 | NM_139279    |
| 1.075 | PIK3IP1       | phosphoinositide-3-kinase interacting protein 1 (PIK3IP1), mRNA.                                                | Hs.26670  | NM_052880    |
| 1.073 | VEGFC         | vascular endothelial growth factor C (VEGFC), mRNA.                                                             | Hs.435215 | NM_005429    |
| 1.069 | DUSP3         | dual specificity phosphatase 3 (DUSP3), mRNA.                                                                   | Hs.695925 | NM_004090    |
| 1.060 | DHRS7         | dehydrogenase/reductase (SDR family) member 7 (DHRS7), mRNA.                                                    | Hs.59719  | NM_016029    |
| 1.057 | GSG1          | germ cell associated 1 (GSG1), transcript variant 2, mRNA.                                                      | Hs.240053 | NM_153823    |
| 1.051 | SLC16A4       | solute carrier family 16, member 4 (monocarboxylic acid transporter 5) (SLC16A4), mRNA.                         | Hs.351306 | NM_004696    |
| 1.047 | NDRG3         | NDRG family member 3 (NDRG3), transcript variant 2, mRNA.                                                       | Hs.437338 | NM_022477    |
| 1.047 | DHCR7         | 7-dehydrocholesterol reductase (DHCR7), mRNA.                                                                   | Hs.503134 | NM_001360    |
| 1.046 | SC5DL         | sterol-C5-desaturase (ERG3 delta-5-desaturase homolog, S. cerevisiae)-like (SC5DL), transcript variant 1, mRNA. | Hs.287749 | NM_006918    |
| 1.045 | GPR177        | G protein-coupled receptor 177 (GPR177), transcript variant 1, mRNA.                                            | Hs.647659 | NM_024911    |
| 1.044 | SOD2          | Superoxide dismutase 2, mitochondrial                                                                           | Hs.487046 |              |
| 1.044 | BLCAP         | bladder cancer associated protein (BLCAP), mRNA.                                                                | Hs.472651 | NM_006698    |
| 1.044 | GPER          | G protein-coupled estrogen receptor 1 (GPER), transcript variant 4, mRNA.                                       | Hs.20961  | NM_001098201 |
| 1.042 | KRT34         | keratin 34 (KRT34), mRNA.                                                                                       | Hs.296942 | NM_021013    |
| 1.040 | GM2A          | GM2 ganglioside activator (GM2A), mRNA.                                                                         | Hs.483873 | NM_000405    |
| 1.040 | FNDC4         | fibronectin type III domain containing 4 (FNDC4), mRNA.                                                         | Hs.27836  | NM_022823    |
| 1.039 | HOXB5         | homeobox B5 (HOXB5), mRNA.                                                                                      | Hs.654456 | NM_002147    |
| 1.038 | PIP4K2C       | phosphatidylinositol-5-phosphate 4-kinase, type II, gamma (PIP4K2C), mRNA.                                      | Hs.144502 | NM_024779    |
| 1.037 | DKFZP586H2123 | regeneration associated muscle protease (DKFZP586H2123), transcript variant 2, mRNA.                            | Hs.55044  | NM_001001991 |
| 1.034 | STOML1        | stomatin (EPB72)-like 1 (STOML1), mRNA.                                                                         | Hs.194816 | NM_004809    |
| 1.033 | CRYL1         | crystallin, lambda 1 (CRYL1), mRNA.                                                                             | Hs.370703 | NM_015974    |
| 1.031 | TncRNA        | trophoblast-derived noncoding RNA (TncRNA) on chromosome 11.                                                    |           | NR_002802    |
| 1.025 | ABLIM3        | Actin binding LIM protein family, member 3                                                                      | Hs.49688  |              |
| 1.024 | FAM49A        | Family with sequence similarity 49, member A                                                                    | Hs.467769 |              |
| 1.024 | SLC9A7        | solute carrier family 9 (sodium/hydrogen exchanger), member 7 (SLC9A7), mRNA.                                   | Hs.496057 | NM_032591    |

|       |           |                                                                                                                          |           |              |
|-------|-----------|--------------------------------------------------------------------------------------------------------------------------|-----------|--------------|
| 1.023 | IFI6      | interferon, alpha-inducible protein 6 (IFI6), transcript variant 1, mRNA.                                                | Hs.523847 | NM_002038    |
| 1.022 | N4BP2L2   | NEDD4 binding protein 2-like 2 (N4BP2L2), transcript variant 1, mRNA.                                                    | Hs.507680 | NM_033111    |
| 1.021 | SEMA6A    | Sema domain, transmembrane domain (TM), and cytoplasmic domain, (semaphorin) 6A                                          | Hs.156967 |              |
| 1.020 |           | CDNA FLJ30376 fis, clone BRACE2007944                                                                                    | Hs.545023 |              |
| 1.017 | SERINC1   | serine incorporator 1 (SERINC1), mRNA.                                                                                   | Hs.146668 | NM_020755    |
| 1.017 | KCNMA1    | potassium large conductance calcium-activated channel, subfamily M, alpha member 1 (KCNMA1), transcript variant 2, mRNA. | Hs.144795 | NM_002247    |
| 1.017 | STEAP3    | STEAP family member 3 (STEAP3), transcript variant 3, mRNA.                                                              | Hs.647822 | NM_001008410 |
| 1.015 | SCN9A     | sodium channel, voltage-gated, type IX, alpha subunit (SCN9A), mRNA.                                                     | Hs.705382 | NM_002977    |
| 1.014 | ATP6V1A   | ATPase, H <sup>+</sup> transporting, lysosomal 70kDa, V1 subunit A                                                       | Hs.477155 |              |
| 1.012 | ZMAT3     | zinc finger, matrin type 3 (ZMAT3), transcript variant 2, mRNA.                                                          | Hs.386299 | NM_152240    |
| 1.011 | SOD2      | superoxide dismutase 2, mitochondrial (SOD2), nuclear gene encoding mitochondrial protein, transcript variant 3, mRNA.   | Hs.487046 | NM_001024466 |
| 1.011 | DDX58     | DEAD (Asp-Glu-Ala-Asp) box polypeptide 58 (DDX58), mRNA.                                                                 | Hs.190622 | NM_014314    |
| 1.008 | SERINC3   | serine incorporator 3 (SERINC3), transcript variant 1, mRNA.                                                             | Hs.272168 | NM_006811    |
| 1.008 | CKB       | Creatine kinase, brain                                                                                                   | Hs.173724 |              |
| 1.007 | AHCYL2    | S-adenosylhomocysteine hydrolase-like 2 (AHCYL2), mRNA.                                                                  | Hs.600789 | NM_015328    |
| 1.006 | SERINC2   | serine incorporator 2 (SERINC2), mRNA.                                                                                   | Hs.270655 | NM_178865    |
| 1.005 | CPE       | carboxypeptidase E (CPE), mRNA.                                                                                          | Hs.707992 | NM_001873    |
| 1.005 | GSTM1     | Glutathione S-transferase M1                                                                                             | Hs.301961 |              |
| 1.004 | FGF2      | fibroblast growth factor 2 (basic) (FGF2), mRNA.                                                                         | Hs.284244 | NM_002006    |
| 1.002 | SLC22A18  | solute carrier family 22, member 18 (SLC22A18), transcript variant 1, mRNA.                                              | Hs.50868  | NM_002555    |
| 1.002 | HIST1H2BG | Histone cluster 1, H2bg                                                                                                  | Hs.591809 |              |
| 1.001 | PLEKHN1   | pleckstrin homology domain containing, family N member 1 (PLEKHN1), mRNA.                                                | Hs.528691 | NM_032129    |
| 1.000 | TMEM191A  | Transmembrane protein 191A                                                                                               | Hs.546454 |              |

## B. Complete list of 338 downregulated genes in replicative senescence

| Value  | Gene       | Description                                                                                                                | UniGene   | RefSeq       |
|--------|------------|----------------------------------------------------------------------------------------------------------------------------|-----------|--------------|
| -1.001 | TCF4       | transcription factor 4 (TCF4), transcript variant 2, mRNA.                                                                 | Hs.644653 | NM_003199    |
| -1.002 | CENPO      | Centromere protein O                                                                                                       | Hs.467898 |              |
| -1.004 | VGLL3      | Vestigial like 3 (Drosophila)                                                                                              | Hs.435013 |              |
| -1.004 | CACNA1B    | calcium channel, voltage-dependent, N type, alpha 1B subunit (CACNA1B), mRNA.                                              | Hs.495522 | NM_000718    |
| -1.009 | NASP       | nuclear autoantigenic sperm protein (histone-binding) (NASP), transcript variant 3, mRNA.                                  | Hs.319334 | NM_152298    |
| -1.009 |            | CDNA FLJ11313 fis, clone PLACE1010106, highly similar to Homo sapiens mRNA; cDNA DKFZp586M1418                             | Hs.633187 |              |
| -1.010 | DIAPH3     | diaphanous homolog 3 (Drosophila) (DIAPH3), transcript variant 2, mRNA.                                                    | Hs.283127 | NM_030932    |
| -1.011 | BEX4       | BEX family member 4 (BEX4), mRNA.                                                                                          | Hs.184736 | NM_001080425 |
| -1.011 | KLHDC5     | kelch domain containing 5 (KLHDC5), mRNA.                                                                                  | Hs.505104 | NM_020782    |
| -1.013 | ELOVL2     | elongation of very long chain fatty acids (FEN1/Elo2, SUR4/Elo3, yeast)-like 2 (ELOVL2), mRNA.                             | Hs.656436 | NM_017770    |
| -1.014 | SAMD11     | sterile alpha motif domain containing 11 (SAMD11), mRNA.                                                                   | Hs.335293 | NM_152486    |
| -1.014 | CRISPLD2   | cysteine-rich secretory protein LCCL domain containing 2 (CRISPLD2), mRNA.                                                 | Hs.513779 | NM_031476    |
| -1.014 | DAB1       | Disabled homolog 1 (Drosophila)                                                                                            | Hs.477370 |              |
| -1.015 | PTGS1      | prostaglandin-endoperoxide synthase 1 (prostaglandin G/H synthase and cyclooxygenase) (PTGS1), transcript variant 2, mRNA. | Hs.201978 | NM_080591    |
| -1.017 | GPSM2      | G-protein signaling modulator 2 (AGS3-like, C. elegans) (GPSM2), mRNA.                                                     | Hs.584901 | NM_013296    |
| -1.020 | DTYMK      | deoxythymidylate kinase (thymidylate kinase) (DTYMK), mRNA.                                                                | Hs.471873 | NM_012145    |
| -1.020 |            | CDNA FLJ30652 fis, clone DFNES2000011                                                                                      | Hs.592801 |              |
| -1.021 | RAD54L     | RAD54-like (S. cerevisiae) (RAD54L), mRNA.                                                                                 | Hs.706783 | NM_003579    |
| -1.021 | TRPC6      | transient receptor potential cation channel, subfamily C, member 6 (TRPC6), mRNA.                                          | Hs.159003 | NM_004621    |
| -1.022 | SACS       | spastic ataxia of Charlevoix-Saguenay (sacsin) (SACS), mRNA.                                                               | Hs.159492 | NM_014363    |
| -1.022 | GINS3      | GINS complex subunit 3 (Psf3 homolog) (GINS3), mRNA.                                                                       | Hs.47125  | NM_022770    |
| -1.022 | H2AFX      | H2A histone family, member X (H2AFX), mRNA.                                                                                | Hs.477879 | NM_002105    |
| -1.023 | C13orf27   | chromosome 13 open reading frame 27 (C13orf27), mRNA.                                                                      | Hs.398111 | NM_138779    |
| -1.024 | HIST2H2AA3 | histone cluster 2, H2aa3 (HIST2H2AA3), mRNA.                                                                               | Hs.530461 | NM_003516    |
| -1.026 | CDCA4      | cell division cycle associated 4 (CDCA4), transcript variant 13, mRNA.                                                     | Hs.34045  | NM_017955    |
| -1.027 | LOC645561  | PREDICTED: Homo sapiens hypothetical LOC645561 (LOC645561), mRNA                                                           | Hs.527211 |              |
| -1.028 | DEK        | DEK oncogene (DNA binding) (DEK), mRNA.                                                                                    | Hs.695957 | NM_003472    |
| -1.029 | C1R        | complement component 1, r subcomponent (C1R), mRNA.                                                                        | Hs.524224 | NM_001733    |

|        |          |                                                                                                           |           |              |
|--------|----------|-----------------------------------------------------------------------------------------------------------|-----------|--------------|
| -1.030 | FAM102B  | Family with sequence similarity 102, member B                                                             | Hs.200230 |              |
| -1.031 |          | CDNA FLJ12853 fis, clone NT2RP2003456                                                                     | Hs.594569 |              |
| -1.032 | QSER1    | glutamine and serine rich 1 (QSER1), mRNA.                                                                | Hs.369368 | NM_001076786 |
| -1.035 | LSM5     | LSM5 homolog, U6 small nuclear RNA associated (S. cerevisiae) (LSM5), mRNA.                               | Hs.424908 | NM_012322    |
| -1.036 | ECT2     | epithelial cell transforming sequence 2 oncogene (ECT2), mRNA.                                            | Hs.518299 | NM_018098    |
| -1.037 | POLE     | polymerase (DNA directed), epsilon (POLE), mRNA.                                                          | Hs.524871 | NM_006231    |
| -1.043 | DLEU2    | Deleted in lymphocytic leukemia, 2                                                                        | Hs.547964 |              |
| -1.043 | RRM2     | ribonucleotide reductase M2 polypeptide (RRM2), mRNA.                                                     | Hs.226390 | NM_001034    |
| -1.044 | TCF3     | transcription factor 3 (E2A immunoglobulin enhancer binding factors E12/E47) (TCF3), mRNA.                | Hs.371282 | NM_003200    |
| -1.045 |          | CDNA FLJ11405 fis, clone HEMBA1000769                                                                     | Hs.661311 |              |
| -1.049 | CKAP2    | cytoskeleton associated protein 2 (CKAP2), transcript variant 1, mRNA.                                    | Hs.444028 | NM_018204    |
| -1.052 |          | Clone 23636 mRNA sequence                                                                                 | Hs.66163  |              |
| -1.052 | RFC2     | replication factor C (activator 1) 2, 40kDa (RFC2), transcript variant 2, mRNA.                           | Hs.647062 | NM_002914    |
| -1.053 | CCNI     | cyclin I (CCNI), mRNA.                                                                                    | Hs.518827 | NM_006835    |
| -1.054 | ARHGAP28 | Rho GTPase activating protein 28 (ARHGAP28), transcript variant 2, mRNA.                                  | Hs.183114 | NM_030672    |
| -1.059 | SMC2     | structural maintenance of chromosomes 2 (SMC2), transcript variant 3, mRNA.                               | Hs.119023 | NM_006444    |
| -1.060 | PTMA     | Prothymosin, alpha (gene sequence 28)                                                                     | Hs.459927 |              |
| -1.062 | SMCHD1   | structural maintenance of chromosomes flexible hinge domain containing 1 (SMCHD1), mRNA.                  | Hs.8118   | NM_015295    |
| -1.064 | MCM8     | minichromosome maintenance complex component 8 (MCM8), transcript variant 1, mRNA.                        | Hs.631506 | NM_032485    |
| -1.064 | SIX1     | SIX homeobox 1 (SIX1), mRNA.                                                                              | Hs.633506 | NM_005982    |
| -1.066 |          | MRNA from chromosome 5q31-33 region                                                                       | Hs.387207 |              |
| -1.067 | RPL36A   | ribosomal protein L36a (RPL36A), mRNA.                                                                    | Hs.432485 | NM_021029    |
| -1.068 | CCBL2    | cysteine conjugate-beta lyase 2 (CCBL2), transcript variant 3, mRNA.                                      | Hs.481898 | NM_019610    |
| -1.068 | CTDSPL2  | CTD (carboxy-terminal domain, RNA polymerase II, polypeptide A) small phosphatase like 2 (CTDSPL2), mRNA. | Hs.497967 | NM_016396    |
| -1.071 | CDH13    | cadherin 13, H-cadherin (heart) (CDH13), mRNA.                                                            | Hs.654386 | NM_001257    |
| -1.072 | OIP5     | Opa interacting protein 5 (OIP5), mRNA.                                                                   | Hs.661645 | NM_007280    |
| -1.076 | F2RL1    | coagulation factor II (thrombin) receptor-like 1 (F2RL1), mRNA.                                           | Hs.154299 | NM_005242    |
| -1.079 | PKMYT1   | Protein kinase, membrane associated tyrosine/threonine 1                                                  | Hs.77783  |              |
| -1.082 | CCDC111  | coiled-coil domain containing 111 (CCDC111), mRNA.                                                        | Hs.481307 | NM_152683    |
| -1.083 | NCAPG2   | non-SMC condensin II complex, subunit G2 (NCAPG2), mRNA.                                                  | Hs.18616  | NM_017760    |
| -1.084 | RHOBTB3  | Rho-related BTB domain containing 3 (RHOBTB3), mRNA.                                                      | Hs.445030 | NM_014899    |
| -1.085 | TOPBP1   | topoisomerase (DNA) II binding protein 1 (TOPBP1), mRNA.                                                  | Hs.53454  | NM_007027    |
| -1.085 | CDC7     | cell division cycle 7 homolog (S. cerevisiae) (CDC7), mRNA.                                               | Hs.533573 | NM_003503    |

|        |          |                                                                                                     |           |              |
|--------|----------|-----------------------------------------------------------------------------------------------------|-----------|--------------|
| -1.085 | CDH2     | cadherin 2, type 1, N-cadherin (neuronal) (CDH2), mRNA.                                             | Hs.464829 | NM_001792    |
| -1.090 | PZP      | pregnancy-zone protein (PZP), mRNA.                                                                 | Hs.212838 | NM_002864    |
| -1.091 | TROAP    | trophinin associated protein (tastin) (TROAP), transcript variant 1, mRNA.                          | Hs.524399 | NM_005480    |
| -1.093 | CCNE2    | cyclin E2 (CCNE2), mRNA.                                                                            | Hs.567387 | NM_057749    |
| -1.094 | MCM4     | minichromosome maintenance complex component 4 (MCM4), transcript variant 2, mRNA.                  | Hs.460184 | NM_182746    |
| -1.095 | C13orf3  | chromosome 13 open reading frame 3 (C13orf3), mRNA.                                                 | Hs.88523  | NM_145061    |
| -1.097 | NUSAP1   | nucleolar and spindle associated protein 1 (NUSAP1), transcript variant 2, mRNA.                    | Hs.615092 | NM_018454    |
| -1.101 | PKIA     | protein kinase (cAMP-dependent, catalytic) inhibitor alpha (PKIA), transcript variant 7, mRNA.      | Hs.433700 | NM_181839    |
| -1.103 | PTMA     | prothymosin, alpha (gene sequence 28) (PTMA), transcript variant 2, mRNA.                           | Hs.459927 | NM_002823    |
| -1.104 | PDS5B    | PDS5, regulator of cohesion maintenance, homolog B ( <i>S. cerevisiae</i> ) (PDS5B), mRNA.          | Hs.708081 | NM_015032    |
| -1.105 | BUB1     | BUB1 budding uninhibited by benzimidazoles 1 homolog (yeast) (BUB1), mRNA.                          | Hs.469649 | NM_004336    |
| -1.105 | NR4A2    | nuclear receptor subfamily 4, group A, member 2 (NR4A2), transcript variant 4, mRNA.                | Hs.563344 | NM_173173    |
| -1.106 | LOC1720  | Dihydrofolate reductase pseudogene (psi-hd1)                                                        | Hs.169235 |              |
| -1.108 | MXD3     | MAX dimerization protein 3 (MXD3), mRNA.                                                            | Hs.702195 | NM_031300    |
| -1.109 | FAM111B  | family with sequence similarity 111, member B (FAM111B), mRNA.                                      | Hs.186579 | NM_198947    |
| -1.109 |          | Uncharacterized gastric protein ZA32P                                                               | Hs.675123 |              |
| -1.109 | ANLN     | anillin, actin binding protein (ANLN), mRNA.                                                        | Hs.62180  | NM_018685    |
| -1.110 | RNASEH2B | ribonuclease H2, subunit B (RNASEH2B), mRNA.                                                        | Hs.306291 | NM_024570    |
| -1.111 | CHRM2    | cholinergic receptor, muscarinic 2 (CHRM2), transcript variant 8, mRNA.                             | Hs.535891 | NM_001006629 |
| -1.112 |          | CDNA FLJ12196 fis, clone MAMMA1000867                                                               | Hs.659733 |              |
| -1.115 | CDCA7L   | cell division cycle associated 7-like (CDCA7L), mRNA.                                               | Hs.520245 | NM_018719    |
| -1.117 | RACGAP1P | Rac GTPase activating protein 1 pseudogene                                                          | Hs.650500 |              |
| -1.124 | MYLK     | myosin light chain kinase (MYLK), transcript variant 7, mRNA.                                       | Hs.556600 | NM_053031    |
| -1.125 | NEK2     | NIMA (never in mitosis gene a)-related kinase 2 (NEK2), mRNA.                                       | Hs.153704 | NM_002497    |
| -1.127 | MARCKS   | myristoylated alanine-rich protein kinase C substrate (MARCKS), mRNA.                               | Hs.519909 | NM_002356    |
| -1.128 | SMC2     | structural maintenance of chromosomes 2 (SMC2), transcript variant 3, mRNA.                         | Hs.119023 | NM_006444    |
| -1.128 | CENPJ    | centromere protein J (CENPJ), mRNA.                                                                 | Hs.513379 | NM_018451    |
| -1.129 | PSRC1    | proline/serine-rich coiled-coil 1 (PSRC1), transcript variant 2, mRNA.                              | Hs.405925 | NM_001005290 |
| -1.129 | KIF23    | kinesin family member 23 (KIF23), transcript variant 2, mRNA.                                       | Hs.270845 | NM_004856    |
| -1.130 | SHCBP1   | SHC SH2-domain binding protein 1 (SHCBP1), mRNA.                                                    | Hs.123253 | NM_024745    |
| -1.130 | ZWILCH   | Zwilch, kinetochore associated, homolog ( <i>Drosophila</i> ) (ZWILCH), transcript variant 1, mRNA. | Hs.21331  | NM_017975    |
| -1.132 | RSBN1L   | CDNA clone IMAGE:4791585                                                                            | Hs.72451  |              |
| -1.133 | LMNB2    | lamin B2 (LMNB2), mRNA.                                                                             | Hs.538286 | NM_032737    |

|        |           |                                                                                                             |           |              |
|--------|-----------|-------------------------------------------------------------------------------------------------------------|-----------|--------------|
| -1.133 | RACGAP1   | Rac GTPase activating protein 1 (RACGAP1), mRNA.                                                            | Hs.708122 | NM_013277    |
| -1.133 | TCF4      | transcription factor 4 (TCF4), transcript variant 2, mRNA.                                                  | Hs.644653 | NM_003199    |
| -1.134 | POLA1     | polymerase (DNA directed), alpha 1 (POLA1), mRNA.                                                           | Hs.567319 | NM_016937    |
| -1.140 | SGK1      | serum/glucocorticoid regulated kinase 1 (SGK1), mRNA.                                                       | Hs.510078 | NM_005627    |
| -1.140 | H2AFZ     | H2A histone family, member Z (H2AFZ), mRNA.                                                                 | Hs.119192 | NM_002106    |
| -1.142 | CDCA3     | cell division cycle associated 3 (CDCA3), mRNA.                                                             | Hs.524216 | NM_031299    |
| -1.143 | DUT       | deoxyuridine triphosphatase (DUT), nuclear gene encoding mitochondrial protein, transcript variant 3, mRNA. | Hs.527980 | NM_001025249 |
| -1.144 | KITLG     | KIT ligand (KITLG), transcript variant b, mRNA.                                                             | Hs.1048   | NM_000899    |
| -1.145 | CCDC109B  | coiled-coil domain containing 109B (CCDC109B), mRNA.                                                        | Hs.234149 | NM_017918    |
| -1.147 | EXOSC9    | exosome component 9 (EXOSC9), transcript variant 2, mRNA.                                                   | Hs.91728  | NM_005033    |
| -1.147 | SMCHD1    | structural maintenance of chromosomes flexible hinge domain containing 1 (SMCHD1), mRNA.                    | Hs.8118   | NM_015295    |
| -1.156 | FAM83D    | family with sequence similarity 83, member D (FAM83D), mRNA.                                                | Hs.472716 | NM_030919    |
| -1.157 | MEIS1     | Meis homeobox 1 (MEIS1), mRNA.                                                                              | Hs.526754 | NM_002398    |
| -1.158 | E2F8      | E2F transcription factor 8 (E2F8), mRNA.                                                                    | Hs.523526 | NM_024680    |
| -1.161 | MME       | membrane metallo-endopeptidase (MME), transcript variant 1bis, mRNA.                                        | Hs.307734 | NM_007287    |
| -1.163 | IL11      | interleukin 11 (IL11), mRNA.                                                                                | Hs.467304 | NM_000641    |
| -1.164 | C10orf119 | chromosome 10 open reading frame 119 (C10orf119), mRNA.                                                     | Hs.124246 | NM_024834    |
| -1.165 | LOC389831 | CDNA: FLJ23285 fis, clone HEP09071                                                                          | Hs.389638 |              |
| -1.167 | CENPK     | centromere protein K (CENPK), mRNA.                                                                         | Hs.529778 | NM_022145    |
| -1.169 | BIRC5     | baculoviral IAP repeat-containing 5 (survivin) (BIRC5), transcript variant 2, mRNA.                         | Hs.514527 | NM_001012270 |
| -1.171 | ST3GAL1   | ST3 beta-galactoside alpha-2,3-sialyltransferase 1                                                          | Hs.584803 |              |
| -1.171 | ELN       | elastin (supravalvular aortic stenosis, Williams-Beuren syndrome) (ELN), transcript variant 2, mRNA.        | Hs.647061 | NM_001081752 |
| -1.174 | CENPH     | centromere protein H (CENPH), mRNA.                                                                         | Hs.631967 | NM_022909    |
| -1.174 | LMNB2     | Lamin B2                                                                                                    |           |              |
| -1.175 | KNTC1     | kinetochore associated 1 (KNTC1), mRNA.                                                                     | Hs.300559 | NM_014708    |
| -1.175 | CDCA2     | cell division cycle associated 2 (CDCA2), mRNA.                                                             | Hs.33366  | NM_152562    |
| -1.176 | FBXO4     | F-box protein 4 (FBXO4), transcript variant 1, mRNA.                                                        | Hs.165575 | NM_012176    |
| -1.177 | COLEC10   | collectin sub-family member 10 (C-type lectin) (COLEC10), mRNA.                                             | Hs.176615 | NM_006438    |
| -1.181 | SPAG5     | sperm associated antigen 5 (SPAG5), mRNA.                                                                   | Hs.514033 | NM_006461    |
| -1.183 | STOX2     | storkhead box 2 (STOX2), mRNA.                                                                              | Hs.696657 | NM_020225    |
| -1.184 | PCOLCE    | procollagen C-endopeptidase enhancer (PCOLCE), mRNA.                                                        | Hs.202097 | NM_002593    |
| -1.185 | CENPN     | centromere protein N (CENPN), transcript variant 2, mRNA.                                                   | Hs.55028  | NM_001100624 |
| -1.187 | HSPA2     | heat shock 70kDa protein 2 (HSPA2), mRNA.                                                                   | Hs.432648 | NM_021979    |

|        |           |                                                                                                                                                                                                      |           |              |
|--------|-----------|------------------------------------------------------------------------------------------------------------------------------------------------------------------------------------------------------|-----------|--------------|
| -1.189 | DNA2      | DNA replication helicase 2 homolog (yeast) (DNA2), mRNA.                                                                                                                                             | Hs.532446 | NM_001080449 |
| -1.193 | GREM1     | gremlin 1, cysteine knot superfamily, homolog ( <i>Xenopus laevis</i> ) (GREM1), mRNA.                                                                                                               | Hs.40098  | NM_013372    |
| -1.196 | FERMT2    | fermitin family homolog 2 ( <i>Drosophila</i> ) (FERMT2), mRNA.                                                                                                                                      | Hs.509343 | NM_006832    |
| -1.201 | SALL1     | sal-like 1 ( <i>Drosophila</i> ) (SALL1), mRNA.                                                                                                                                                      | Hs.135787 | NM_002968    |
| -1.202 | CDC25A    | cell division cycle 25 homolog A ( <i>S. pombe</i> ) (CDC25A), transcript variant 2, mRNA.                                                                                                           | Hs.437705 | NM_201567    |
| -1.205 | CKS2      | CDC28 protein kinase regulatory subunit 2 (CKS2), mRNA.                                                                                                                                              | Hs.83758  | NM_001827    |
| -1.209 | PRKD3     | protein kinase D3 (PRKD3), mRNA.                                                                                                                                                                     | Hs.696257 | NM_005813    |
| -1.210 | FST       | follistatin (FST), transcript variant FST317, mRNA.                                                                                                                                                  | Hs.9914   | NM_006350    |
| -1.211 | C13orf15  | chromosome 13 open reading frame 15 (C13orf15), mRNA.                                                                                                                                                | Hs.507866 | NM_014059    |
| -1.214 | ARHGAP11A | Rho GTPase activating protein 11A (ARHGAP11A), transcript variant 1, mRNA.                                                                                                                           | Hs.591130 | NM_014783    |
| -1.216 | NCAPH2    | non-SMC condensin II complex, subunit H2 (NCAPH2), transcript variant 2, mRNA.                                                                                                                       | Hs.180903 | NM_152299    |
| -1.220 | PDGFD     | platelet derived growth factor D (PDGFD), transcript variant 2, mRNA.                                                                                                                                | Hs.352298 | NM_033135    |
| -1.221 | MMD       | monocyte to macrophage differentiation-associated (MMD), mRNA.                                                                                                                                       | Hs.463483 | NM_012329    |
| -1.223 | UBE2T     | ubiquitin-conjugating enzyme E2T (putative) (UBE2T), mRNA.                                                                                                                                           | Hs.5199   | NM_014176    |
| -1.224 | ATP2B1    | ATPase, Ca <sup>++</sup> transporting, plasma membrane 1 (ATP2B1), transcript variant 2, mRNA.                                                                                                       | Hs.506276 | NM_001682    |
| -1.224 | HIST1H2AL | histone cluster 1, H2al (HIST1H2AL), mRNA.                                                                                                                                                           | Hs.233568 | NM_003511    |
| -1.228 | H2AFV     | H2a histone family, member V (H2AFV), transcript variant 2, mRNA.                                                                                                                                    | Hs.488189 | NM_138635    |
| -1.228 | HMMR      | hyaluronan-mediated motility receptor (RHAMM) (HMMR), transcript variant 2, mRNA.                                                                                                                    | Hs.72550  | NM_012485    |
| -1.231 | CLEC14A   | C-type lectin domain family 14, member A                                                                                                                                                             | Hs.525307 |              |
| -1.234 | CDKN1B    | cyclin-dependent kinase inhibitor 1B (p27, Kip1) (CDKN1B), mRNA.                                                                                                                                     | Hs.238990 | NM_004064    |
| -1.236 | CENPQ     | centromere protein Q (CENPQ), mRNA.                                                                                                                                                                  | Hs.88663  | NM_018132    |
| -1.238 | CENPA     | centromere protein A (CENPA), transcript variant 2, mRNA.                                                                                                                                            | Hs.1594   | NM_001042426 |
| -1.240 | MCM6      | minichromosome maintenance complex component 6 (MCM6), mRNA.                                                                                                                                         | Hs.444118 | NM_005915    |
| -1.242 | SERPINH1  | serpin peptidase inhibitor, clade H (heat shock protein 47), member 1, (collagen binding protein 1) (SERPINH1), mRNA.                                                                                | Hs.596449 | NM_001235    |
| -1.242 | RBBP8     | retinoblastoma binding protein 8 (RBBP8), transcript variant 3, mRNA.                                                                                                                                | Hs.546282 | NM_203292    |
| -1.247 | CCDC45    | coiled-coil domain containing 45 (CCDC45), mRNA.                                                                                                                                                     | Hs.569713 | NM_138363    |
| -1.248 | GINS2     | GINS complex subunit 2 ( <i>Psf2</i> homolog) (GINS2), mRNA.                                                                                                                                         | Hs.433180 | NM_016095    |
| -1.250 | PLK1      | polo-like kinase 1 ( <i>Drosophila</i> ) (PLK1), mRNA.                                                                                                                                               | Hs.592049 | NM_005030    |
| -1.250 | NTN4      | netrin 4 (NTN4), mRNA.                                                                                                                                                                               | Hs.201034 | NM_021229    |
| -1.252 | HELLS     | helicase, lymphoid-specific (HELLS), mRNA.                                                                                                                                                           | Hs.655830 | NM_018063    |
| -1.254 | MTHFD2    | methylenetetrahydrofolate dehydrogenase (NADP <sup>+</sup> dependent) 2, methylenetetrahydrofolate cyclohydrolase (MTHFD2), nuclear gene encoding mitochondrial protein, transcript variant 1, mRNA. | Hs.469030 | NM_006636    |
| -1.255 | EDNRB     | endothelin receptor type B (EDNRB), transcript variant 1, mRNA.                                                                                                                                      | Hs.82002  | NM_000115    |

|        |           |                                                                                                                              |           |              |
|--------|-----------|------------------------------------------------------------------------------------------------------------------------------|-----------|--------------|
| -1.255 | LDB2      | LIM domain binding 2 (LDB2), mRNA.                                                                                           | Hs.23748  | NM_001290    |
| -1.255 | ATAD2     | ATPase family, AAA domain containing 2 (ATAD2), mRNA.                                                                        | Hs.370834 | NM_014109    |
| -1.256 | GRK5      | G protein-coupled receptor kinase 5 (GRK5), mRNA.                                                                            | Hs.524625 | NM_005308    |
| -1.256 | C14orf145 | chromosome 14 open reading frame 145 (C14orf145), mRNA.                                                                      | Hs.162889 | NM_152446    |
| -1.256 | PHF10     | PHD finger protein 10 (PHF10), transcript variant 2, mRNA.                                                                   | Hs.435933 | NM_133325    |
| -1.258 | WDR76     | WD repeat domain 76 (WDR76), mRNA.                                                                                           | Hs.250154 | NM_024908    |
| -1.259 | C12orf48  | chromosome 12 open reading frame 48 (C12orf48), mRNA.                                                                        | Hs.330663 | NM_017915    |
| -1.260 | LBH       | limb bud and heart development homolog (mouse) (LBH), mRNA.                                                                  | Hs.567598 | NM_030915    |
| -1.260 | CENPM     | centromere protein M (CENPM), transcript variant 3, mRNA.                                                                    | Hs.208912 | NM_001110215 |
| -1.261 | MKI67     | antigen identified by monoclonal antibody Ki-67 (MKI67), mRNA.                                                               | Hs.80976  | NM_002417    |
| -1.261 | SLC7A2    | solute carrier family 7 (cationic amino acid transporter, y+ system), member 2 (SLC7A2), transcript variant 2, mRNA.         | Hs.448520 | NM_001008539 |
| -1.264 | TPX2      | TPX2, microtubule-associated, homolog (Xenopus laevis) (TPX2), mRNA.                                                         | Hs.244580 | NM_012112    |
| -1.265 | PRRX2     | paired related homeobox 2 (PRRX2), mRNA.                                                                                     | Hs.660115 | NM_016307    |
| -1.277 | TNFSF4    | tumor necrosis factor (ligand) superfamily, member 4 (tax-transcriptionally activated glycoprotein 1, 34kDa) (TNFSF4), mRNA. | Hs.181097 | NM_003326    |
| -1.280 | KIF22     | kinesin family member 22 (KIF22), mRNA.                                                                                      | Hs.613351 | NM_007317    |
| -1.281 | SGOL2     | shugoshin-like 2 (S. pombe) (SGOL2), mRNA.                                                                                   | Hs.655182 | NM_152524    |
| -1.283 | TCF21     | transcription factor 21 (TCF21), transcript variant 2, mRNA.                                                                 | Hs.78061  | NM_003206    |
| -1.283 | GREM2     | gremlin 2, cysteine knot superfamily, homolog (Xenopus laevis) (GREM2), mRNA.                                                | Hs.98206  | NM_022469    |
| -1.289 | DEPDC1    | DEP domain containing 1 (DEPDC1), transcript variant 2, mRNA.                                                                | Hs.445098 | NM_017779    |
| -1.290 | EMILIN2   | elastin microfibril interfacier 2 (EMILIN2), mRNA.                                                                           | Hs.532815 | NM_032048    |
| -1.292 | FOXM1     | forkhead box M1 (FOXM1), transcript variant 3, mRNA.                                                                         | Hs.239    | NM_202003    |
| -1.297 | ZNF524    | zinc finger protein 524 (ZNF524), mRNA.                                                                                      | Hs.440291 | NM_153219    |
| -1.298 | SPINK2    | serine peptidase inhibitor, Kazal type 2 (acrosin-trypsin inhibitor) (SPINK2), mRNA.                                         | Hs.98243  | NM_021114    |
| -1.301 | COL3A1    | Collagen, type III, alpha 1 (Ehlers-Danlos syndrome type IV, autosomal dominant)                                             | Hs.443625 |              |
| -1.303 | LRRCC1    | leucine rich repeat and coiled-coil domain containing 1 (LRRCC1), transcript variant 2, mRNA.                                | Hs.193115 | NM_001077501 |
| -1.303 | CBS       | cystathionine-beta-synthase (CBS), mRNA.                                                                                     | Hs.533013 | NM_000071    |
| -1.307 | TMPO      | thymopoietin (TMPO), transcript variant 1, mRNA.                                                                             | Hs.11355  | NM_003276    |
| -1.308 | PELI2     | pellino homolog 2 (Drosophila) (PELI2), mRNA.                                                                                | Hs.657926 | NM_021255    |
| -1.308 |           | CDNA FLJ11381 fis, clone HEMBA1000501                                                                                        | Hs.463677 |              |
| -1.310 | OLFM2     | olfactomedin 2 (OLFM2), mRNA.                                                                                                | Hs.169743 | NM_058164    |
| -1.311 | PBK       | PDZ binding kinase (PBK), mRNA.                                                                                              | Hs.104741 | NM_018492    |
| -1.311 |           | CDNA FLJ20134 fis, clone COL06604                                                                                            | Hs.675416 |              |

|        |          |                                                                                                      |           |              |
|--------|----------|------------------------------------------------------------------------------------------------------|-----------|--------------|
| -1.311 | CYP1B1   | cytochrome P450, family 1, subfamily B, polypeptide 1 (CYP1B1), mRNA.                                | Hs.154654 | NM_000104    |
| -1.312 | CDKN2C   | cyclin-dependent kinase inhibitor 2C (p18, inhibits CDK4) (CDKN2C), transcript variant 2, mRNA.      | Hs.525324 | NM_078626    |
| -1.318 | RPS6KA2  | ribosomal protein S6 kinase, 90kDa, polypeptide 2 (RPS6KA2), transcript variant 2, mRNA.             | Hs.655277 | NM_001006932 |
| -1.319 | KIAA1524 | KIAA1524 (KIAA1524), mRNA.                                                                           | Hs.591308 | NM_020890    |
| -1.322 | KIF11    | kinesin family member 11 (KIF11), mRNA.                                                              | Hs.8878   | NM_004523    |
| -1.331 | MEF2A    | Myocyte enhancer factor 2A                                                                           | Hs.268675 |              |
| -1.332 | THBS2    | Thrombospondin 2                                                                                     | Hs.371147 |              |
| -1.332 | LUM      | lumican (LUM), mRNA.                                                                                 | Hs.406475 | NM_002345    |
| -1.333 | MYH10    | myosin, heavy chain 10, non-muscle (MYH10), mRNA.                                                    | Hs.16355  | NM_005964    |
| -1.337 | ATAD2    | ATPase family, AAA domain containing 2 (ATAD2), mRNA.                                                | Hs.370834 | NM_014109    |
| -1.337 | TSPAN12  | tetraspanin 12 (TSPAN12), mRNA.                                                                      | Hs.16529  | NM_012338    |
| -1.338 | TNFAIP6  | tumor necrosis factor, alpha-induced protein 6 (TNFAIP6), mRNA.                                      | Hs.437322 | NM_007115    |
| -1.340 | C1orf112 | chromosome 1 open reading frame 112 (C1orf112), mRNA.                                                | Hs.443551 | NM_018186    |
| -1.342 | HMGB1    | high-mobility group box 1 (HMGB1), mRNA.                                                             | Hs.434102 | NM_002128    |
| -1.350 | KLHL23   | Kelch-like 23 (Drosophila)                                                                           | Hs.655150 |              |
| -1.351 | PBX1     | Pre-B-cell leukemia homeobox 1                                                                       | Hs.654412 |              |
| -1.354 | RPS6KA2  | ribosomal protein S6 kinase, 90kDa, polypeptide 2 (RPS6KA2), transcript variant 2, mRNA.             | Hs.655277 | NM_001006932 |
| -1.354 | CCNB2    | cyclin B2 (CCNB2), mRNA.                                                                             | Hs.194698 | NM_004701    |
| -1.355 | COL4A1   | collagen, type IV, alpha 1 (COL4A1), mRNA.                                                           | Hs.17441  | NM_001845    |
| -1.356 |          | Human DNA sequence from clone 170F5 on chromosome Xq22.3-24. Contains an HMG1 (high-mobility group ( |           |              |
| -1.359 | PRIM1    | primase, DNA, polypeptide 1 (49kDa) (PRIM1), mRNA.                                                   | Hs.534339 | NM_000946    |
| -1.359 | MCM10    | minichromosome maintenance complex component 10 (MCM10), transcript variant 2, mRNA.                 | Hs.198363 | NM_018518    |
| -1.359 |          | CDNA FLJ25399 fis, clone TST02783                                                                    | Hs.511432 |              |
| -1.360 | CCL2     | chemokine (C-C motif) ligand 2 (CCL2), mRNA.                                                         | Hs.303649 | NM_002982    |
| -1.361 | ARL5B    | ADP-ribosylation factor-like 5B (ARL5B), mRNA.                                                       | Hs.25362  | NM_178815    |
| -1.366 | NCAPG    | non-SMC condensin I complex, subunit G (NCAPG), mRNA.                                                | Hs.567567 | NM_022346    |
| -1.367 | GMNN     | geminin, DNA replication inhibitor (GMNN), mRNA.                                                     | Hs.234896 | NM_015895    |
| -1.368 | DLG7     | discs, large homolog 7 (Drosophila) (DLG7), mRNA.                                                    | Hs.77695  | NM_014750    |
| -1.369 | TCF19    | transcription factor 19 (SC1) (TCF19), transcript variant 2, mRNA.                                   | Hs.584807 | NM_001077511 |
| -1.378 | SOCS1    | suppressor of cytokine signaling 1 (SOCS1), mRNA.                                                    | Hs.50640  | NM_003745    |
| -1.382 | KIF2C    | kinesin family member 2C (KIF2C), mRNA.                                                              | Hs.69360  | NM_006845    |
| -1.384 |          | CDNA FLJ10230 fis, clone HEMBB1000215                                                                | Hs.655535 |              |
| -1.384 |          | CDNA FLJ13419 fis, clone PLACE1002115                                                                | Hs.656728 |              |

|        |           |                                                                                                      |           |           |
|--------|-----------|------------------------------------------------------------------------------------------------------|-----------|-----------|
| -1.391 |           | Human DNA sequence from clone 38C16 on chromosome 6q22.33-24.1. Contains GAPD (glyceraldehyde 3-phos |           |           |
| -1.399 | TMEM155   | transmembrane protein 155 (TMEM155), mRNA.                                                           | Hs.27524  | NM_152399 |
| -1.404 | MELK      | maternal embryonic leucine zipper kinase (MELK), mRNA.                                               | Hs.184339 | NM_014791 |
| -1.412 | HIST1H4A  | Histone cluster 1, H4a                                                                               | Hs.248178 |           |
| -1.414 | LOC91461  | hypothetical protein BC007901 (LOC91461), mRNA.                                                      | Hs.408542 | NM_138370 |
| -1.416 | NNMT      | nicotinamide N-methyltransferase (NNMT), mRNA.                                                       | Hs.503911 | NM_006169 |
| -1.417 | HELLS     | Helicase, lymphoid-specific                                                                          | Hs.655830 |           |
| -1.418 | SGCE      | sarcoglycan, epsilon (SGCE), transcript variant 2, mRNA.                                             | Hs.371199 | NM_003919 |
| -1.421 | CEP55     | centrosomal protein 55kDa (CEP55), mRNA.                                                             | Hs.14559  | NM_018131 |
| -1.432 | PRC1      | protein regulator of cytokinesis 1 (PRC1), transcript variant 3, mRNA.                               | Hs.567385 | NM_199414 |
| -1.433 | MPHOSPH1  | M-phase phosphoprotein 1 (MPHOSPH1), mRNA.                                                           | Hs.240    | NM_016195 |
| -1.436 | PDGFRA    | platelet-derived growth factor receptor, alpha polypeptide (PDGFRA), mRNA.                           | Hs.74615  | NM_006206 |
| -1.437 | CDKN3     | cyclin-dependent kinase inhibitor 3 (CDK2-associated dual specificity phosphatase) (CDKN3), mRNA.    | Hs.84113  | NM_005192 |
| -1.438 | RFC4      | replication factor C (activator 1) 4, 37kDa (RFC4), transcript variant 2, mRNA.                      | Hs.518475 | NM_181573 |
| -1.458 | PDE7B     | phosphodiesterase 7B (PDE7B), mRNA.                                                                  | Hs.652367 | NM_018945 |
| -1.458 | TNFRSF11B | tumor necrosis factor receptor superfamily, member 11b (osteoprotegerin) (TNFRSF11B), mRNA.          | Hs.81791  | NM_002546 |
| -1.459 | PPAP2B    | phosphatidic acid phosphatase type 2B (PPAP2B), transcript variant 2, mRNA.                          | Hs.708050 | NM_177414 |
| -1.465 | CENPE     | centromere protein E, 312kDa (CENPE), mRNA.                                                          | Hs.75573  | NM_001813 |
| -1.466 | MCM3      | minichromosome maintenance complex component 3 (MCM3), mRNA.                                         | Hs.179565 | NM_002388 |
| -1.467 | SCARA3    | scavenger receptor class A, member 3 (SCARA3), transcript variant 1, mRNA.                           | Hs.128856 | NM_016240 |
| -1.467 | MLF1IP    | MLF1 interacting protein (MLF1IP), mRNA.                                                             | Hs.575032 | NM_024629 |
| -1.470 | KIFC1     | kinesin family member C1 (KIFC1), mRNA.                                                              | Hs.436912 | NM_002263 |
| -1.481 | PBX1      | pre-B-cell leukemia homeobox 1 (PBX1), mRNA.                                                         | Hs.654412 | NM_002585 |
| -1.481 | NETO2     | neuropilin (NRP) and tolloid (TLL)-like 2 (NETO2), mRNA.                                             | Hs.444046 | NM_018092 |
| -1.482 | PHLDB2    | pleckstrin homology-like domain, family B, member 2 (PHLDB2), mRNA.                                  | Hs.477114 | NM_145753 |
| -1.484 | FOS       | v-fos FBJ murine osteosarcoma viral oncogene homolog (FOS), mRNA.                                    | Hs.25647  | NM_005252 |
| -1.484 | EXO1      | exonuclease 1 (EXO1), transcript variant 3, mRNA.                                                    | Hs.498248 | NM_003686 |
| -1.490 | CTSK      | cathepsin K (CTSK), mRNA.                                                                            | Hs.632466 | NM_000396 |
| -1.491 |           | CDNA FLJ10176 fis, clone HEMBA1004074                                                                | Hs.675448 |           |
| -1.500 | HIST1H3J  | histone cluster 1, H3j (HIST1H3J), mRNA.                                                             | Hs.484990 | NM_003535 |
| -1.503 | C5orf13   | chromosome 5 open reading frame 13 (C5orf13), mRNA.                                                  | Hs.36053  | NM_004772 |
| -1.507 | ACTA2     | actin, alpha 2, smooth muscle, aorta (ACTA2), mRNA.                                                  | Hs.500483 | NM_001613 |

|        |           |                                                                                                                              |           |              |
|--------|-----------|------------------------------------------------------------------------------------------------------------------------------|-----------|--------------|
| -1.511 | RARRES2   | retinoic acid receptor responder (tazarotene induced) 2 (RARRES2), mRNA.                                                     | Hs.647064 | NM_002889    |
| -1.511 | CENPF     | centromere protein F, 350/400ka (mitosin) (CENPF), mRNA.                                                                     | Hs.497741 | NM_016343    |
| -1.519 | KIF15     | kinesin family member 15 (KIF15), mRNA.                                                                                      | Hs.658939 | NM_020242    |
| -1.524 | HNMT      | histamine N-methyltransferase (HNMT), transcript variant 1, mRNA.                                                            | Hs.42151  | NM_006895    |
| -1.526 | RASSF2    | Ras association (RalGDS/AF-6) domain family member 2 (RASSF2), transcript variant 2, mRNA.                                   | Hs.631504 | NM_170774    |
| -1.533 | LBR       | lamin B receptor (LBR), transcript variant 2, mRNA.                                                                          | Hs.435166 | NM_194442    |
| -1.542 | BUB1B     | BUB1 budding uninhibited by benzimidazoles 1 homolog beta (yeast) (BUB1B), mRNA.                                             | Hs.631699 | NM_001211    |
| -1.545 | BRCA2     | breast cancer 2, early onset (BRCA2), mRNA.                                                                                  | Hs.34012  | NM_000059    |
| -1.550 | ASNS      | asparagine synthetase (ASNS), transcript variant 2, mRNA.                                                                    | Hs.489207 | NM_001673    |
| -1.557 | RGS2      | regulator of G-protein signaling 2, 24kDa (RGS2), mRNA.                                                                      | Hs.78944  | NM_002923    |
| -1.559 | ITGA1     | integrin, alpha 1 (ITGA1), mRNA.                                                                                             | Hs.696076 | NM_181501    |
| -1.566 | KIF18A    | kinesin family member 18A (KIF18A), mRNA.                                                                                    | Hs.301052 | NM_031217    |
| -1.569 | C18orf24  | chromosome 18 open reading frame 24 (C18orf24), transcript variant 2, mRNA.                                                  | Hs.134726 | NM_145060    |
| -1.575 | ADAMTS7   | ADAM metalloproteinase with thrombospondin type 1 motif, 7 (ADAMTS7), mRNA.                                                  | Hs.16441  | NM_014272    |
| -1.576 | CTGF      | connective tissue growth factor (CTGF), mRNA.                                                                                | Hs.591346 | NM_001901    |
| -1.577 | TGFBR1    | transforming growth factor, beta receptor I (activin A receptor type II-like kinase, 53kDa) (TGFBR1), mRNA.                  | Hs.494622 | NM_004612    |
| -1.582 | USP1      | ubiquitin specific peptidase 1 (USP1), transcript variant 3, mRNA.                                                           | Hs.35086  | NM_001017416 |
| -1.586 | ZNF22     | zinc finger protein 22 (KOX 15) (ZNF22), mRNA.                                                                               | Hs.462693 | NM_006963    |
| -1.593 | C14orf106 | chromosome 14 open reading frame 106 (C14orf106), mRNA.                                                                      | Hs.437941 | NM_018353    |
| -1.625 | ACTG2     | actin, gamma 2, smooth muscle, enteric (ACTG2), mRNA.                                                                        | Hs.516105 | NM_001615    |
| -1.628 | KIF14     | kinesin family member 14 (KIF14), mRNA.                                                                                      | Hs.3104   | NM_014875    |
| -1.638 | DLL4      | delta-like 4 (Drosophila) (DLL4), mRNA.                                                                                      | Hs.511076 | NM_019074    |
| -1.651 | LMCD1     | LIM and cysteine-rich domains 1 (LMCD1), mRNA.                                                                               | Hs.475353 | NM_014583    |
| -1.651 | FBXO5     | F-box protein 5 (FBXO5), mRNA.                                                                                               | Hs.708125 | NM_012177    |
| -1.657 | HIST1H2AJ | histone cluster 1, H2aj (HIST1H2AJ), mRNA.                                                                                   | Hs.406691 | NM_021066    |
| -1.666 | CASP1     | caspase 1, apoptosis-related cysteine peptidase (interleukin 1, beta, convertase) (CASP1), transcript variant epsilon, mRNA. | Hs.2490   | NM_033295    |
| -1.676 | IL1R1     | interleukin 1 receptor, type I (IL1R1), mRNA.                                                                                | Hs.701982 | NM_000877    |
| -1.681 | IGFBP3    | insulin-like growth factor binding protein 3 (IGFBP3), transcript variant 2, mRNA.                                           | Hs.450230 | NM_000598    |
| -1.682 | COLEC12   | collectin sub-family member 12 (COLEC12), mRNA.                                                                              | Hs.464422 | NM_130386    |
| -1.692 | HMGB2     | high-mobility group box 2 (HMGB2), mRNA.                                                                                     | Hs.434953 | NM_002129    |
| -1.693 | GPC6      | glypican 6 (GPC6), mRNA.                                                                                                     | Hs.444329 | NM_005708    |
| -1.707 | C11orf82  | chromosome 11 open reading frame 82 (C11orf82), mRNA.                                                                        | Hs.165607 | NM_145018    |

|        |          |                                                                                                             |           |              |
|--------|----------|-------------------------------------------------------------------------------------------------------------|-----------|--------------|
| -1.707 | ARHGAP28 | Rho GTPase activating protein 28 (ARHGAP28), transcript variant 1, mRNA.                                    | Hs.183114 | NM_001010000 |
| -1.718 | SLFN11   | schlafen family member 11 (SLFN11), transcript variant 5, mRNA.                                             | Hs.462829 | NM_152270    |
| -1.720 | DSCC1    | defective in sister chromatid cohesion 1 homolog (S. cerevisiae) (DSCC1), mRNA.                             | Hs.315167 | NM_024094    |
| -1.721 | PLK4     | polo-like kinase 4 (Drosophila) (PLK4), mRNA.                                                               | Hs.172052 | NM_014264    |
| -1.750 | TGFBR1   | transforming growth factor, beta receptor I (activin A receptor type II-like kinase, 53kDa) (TGFBR1), mRNA. | Hs.494622 | NM_004612    |
| -1.755 | KCNK2    | potassium channel, subfamily K, member 2 (KCNK2), transcript variant 2, mRNA.                               | Hs.497745 | NM_014217    |
| -1.763 | ID4      | inhibitor of DNA binding 4, dominant negative helix-loop-helix protein (ID4), mRNA.                         | Hs.519601 | NM_001546    |
| -1.779 | KLF9     | Kruppel-like factor 9 (KLF9), mRNA.                                                                         | Hs.150557 | NM_001206    |
| -1.782 | HIST1H1D | histone cluster 1, H1d (HIST1H1D), mRNA.                                                                    | Hs.136857 | NM_005320    |
| -1.789 | C9orf19  | chromosome 9 open reading frame 19 (C9orf19), mRNA.                                                         | Hs.493819 | NM_022343    |
| -1.808 | TOP2A    | topoisomerase (DNA) II alpha 170kDa (TOP2A), mRNA.                                                          | Hs.156346 | NM_001067    |
| -1.810 | SOCS2    | suppressor of cytokine signaling 2 (SOCS2), mRNA.                                                           | Hs.485572 | NM_003877    |
| -1.813 | NUF2     | NUF2, NDC80 kinetochore complex component, homolog (S. cerevisiae) (NUF2), transcript variant 2, mRNA.      | Hs.651950 | NM_031423    |
| -1.815 | PCDH18   | protocadherin 18 (PCDH18), mRNA.                                                                            | Hs.591691 | NM_019035    |
| -1.827 | SLC2A5   | solute carrier family 2 (facilitated glucose/fructose transporter), member 5 (SLC2A5), mRNA.                | Hs.530003 | NM_003039    |
| -1.827 | SPOCK1   | Sparc/osteonectin, cwcv and kazal-like domains proteoglycan (testican) 1                                    | Hs.654695 | NM_001086    |
| -1.845 | ASPM     | asp (abnormal spindle) homolog, microcephaly associated (Drosophila) (ASPM), mRNA.                          | Hs.121028 | NM_018136    |
| -1.853 | CCNA2    | cyclin A2 (CCNA2), mRNA.                                                                                    | Hs.58974  | NM_001237    |
| -1.857 | VCAN     | versican (VCAN), mRNA.                                                                                      | Hs.695930 | NM_004385    |
| -1.882 | SMC4     | structural maintenance of chromosomes 4 (SMC4), transcript variant 2, mRNA.                                 | Hs.58992  | NM_001002800 |
| -1.885 | ASPM     | asp (abnormal spindle) homolog, microcephaly associated (Drosophila) (ASPM), mRNA.                          | Hs.121028 | NM_018136    |
| -1.889 | FAM64A   | family with sequence similarity 64, member A (FAM64A), mRNA.                                                | Hs.592116 | NM_019013    |
| -1.892 | IGFBP5   | insulin-like growth factor binding protein 5 (IGFBP5), mRNA.                                                | Hs.635441 | NM_000599    |
| -1.898 | PTGER2   | prostaglandin E receptor 2 (subtype EP2), 53kDa (PTGER2), mRNA.                                             | Hs.2090   | NM_000956    |
| -1.922 | EDNRA    | endothelin receptor type A (EDNRA), mRNA.                                                                   | Hs.183713 | NM_001957    |
| -1.934 | VLDLR    | very low density lipoprotein receptor (VLDLR), transcript variant 2, mRNA.                                  | Hs.370422 | NM_001018056 |
| -1.940 | COL3A1   | collagen, type III, alpha 1 (Ehlers-Danlos syndrome type IV, autosomal dominant) (COL3A1), mRNA.            | Hs.443625 | NM_000090    |
| -1.958 | SRGN     | serglycin (SRGN), mRNA.                                                                                     | Hs.1908   | NM_002727    |
| -1.991 | TNFRSF19 | tumor necrosis factor receptor superfamily, member 19 (TNFRSF19), transcript variant 2, mRNA.               | Hs.149168 | NM_148957    |
| -2.037 | CDC2     | cell division cycle 2, G1 to S and G2 to M (CDC2), transcript variant 2, mRNA.                              | Hs.334562 | NM_033379    |
| -2.051 | C6orf32  | chromosome 6 open reading frame 32 (C6orf32), transcript variant 1, mRNA.                                   | Hs.559459 | NM_014722    |
| -2.056 | CEBPD    | CCAAT/enhancer binding protein (C/EBP), delta (CEBPD), mRNA.                                                | Hs.440829 | NM_005195    |
| -2.068 | C5orf23  | chromosome 5 open reading frame 23 (C5orf23), mRNA.                                                         | Hs.13528  | NM_024563    |

|        |          |                                                                                                      |           |              |
|--------|----------|------------------------------------------------------------------------------------------------------|-----------|--------------|
| -2.077 | NPR3     | natriuretic peptide receptor C/guanylate cyclase C (atriuretic peptide receptor C) (NPR3), mRNA.     | Hs.237028 | NM_000908    |
| -2.167 | TEK      | TEK tyrosine kinase, endothelial (venous malformations, multiple cutaneous and mucosal) (TEK), mRNA. | Hs.89640  | NM_000459    |
| -2.187 | DSG2     | Desmoglein 2                                                                                         | Hs.412597 |              |
| -2.202 | RAMP1    | receptor (G protein-coupled) activity modifying protein 1 (RAMP1), mRNA.                             | Hs.471783 | NM_005855    |
| -2.252 | CDCA7    | cell division cycle associated 7 (CDCA7), transcript variant 2, mRNA.                                | Hs.470654 | NM_145810    |
| -2.264 | COL15A1  | Collagen, type XV, alpha 1                                                                           | Hs.409034 |              |
| -2.303 | CSRP2    | cysteine and glycine-rich protein 2 (CSRP2), mRNA.                                                   | Hs.530904 | NM_001321    |
| -2.315 | TNC      | tenascin C (hexabrachion) (TNC), mRNA.                                                               | Hs.143250 | NM_002160    |
| -2.388 | HIST1H4C | histone cluster 1, H4c (HIST1H4C), mRNA.                                                             | Hs.46423  | NM_003542    |
| -2.420 | FGL2     | fibrinogen-like 2 (FGL2), mRNA.                                                                      | Hs.520989 | NM_006682    |
| -2.541 | GPR126   | G protein-coupled receptor 126 (GPR126), transcript variant b2, mRNA.                                | Hs.318894 | NM_001032395 |
| -2.557 | SPRY1    | sprouty homolog 1, antagonist of FGF signaling (Drosophila) (SPRY1), transcript variant 1, mRNA.     | Hs.436944 | NM_005841    |
| -2.775 | KIAA1199 | KIAA1199 (KIAA1199), mRNA.                                                                           | Hs.459088 | NM_018689    |
| -2.861 | POSTN    | periostin, osteoblast specific factor (POSTN), mRNA.                                                 | Hs.136348 | NM_006475    |
| -2.890 | A2M      | alpha-2-macroglobulin (A2M), mRNA.                                                                   | Hs.212838 | NM_000014    |
| -2.893 | AREG     | amphiregulin (schwannoma-derived growth factor) (AREG), mRNA.                                        | Hs.270833 | NM_001657    |
| -3.016 | IGFBP5   | insulin-like growth factor binding protein 5 (IGFBP5), mRNA.                                         | Hs.635441 | NM_000599    |
