# Supplementary material for: WNT16B Is a New Marker of Cellular Senescence That Regulates p53 Activity and the Phosphoinositide 3-Kinase/AKT Pathway
Source: Oxford University Press journal article supplement (doi:10.1158/0008-5472.can-09-1016), 2009-12-01
Supplement: 00085472can091016-sup-tab_3.pdf [file 00085472can091016-sup-tab_3.pdf]

Table S3.

**A.** Cell cycle

| Value  | Gene   | Description                                                                                     | UniGene   | RefSeq    |
|--------|--------|-------------------------------------------------------------------------------------------------|-----------|-----------|
| -1.079 | PKMYT1 | Protein kinase, membrane associated tyrosine/threonine 1                                        | Hs.77783  |           |
| -1.085 | CDC7   | cell division cycle 7 homolog ( <i>S. cerevisiae</i> ) (CDC7), mRNA.                            | Hs.533573 | NM_003503 |
| -1.093 | CCNE2  | cyclin E2 (CCNE2), mRNA.                                                                        | Hs.567387 | NM_057749 |
| -1.094 | MCM4   | minichromosome maintenance complex component 4 (MCM4), transcript variant 2, mRNA.              | Hs.460184 | NM_182746 |
| -1.105 | BUB1   | BUB1 budding uninhibited by benzimidazoles 1 homolog (yeast) (BUB1), mRNA.                      | Hs.469649 | NM_004336 |
| -1.202 | CDC25A | cell division cycle 25 homolog A ( <i>S. pombe</i> ) (CDC25A), transcript variant 2, mRNA.      | Hs.437705 | NM_201567 |
| -1.234 | CDKN1B | cyclin-dependent kinase inhibitor 1B (p27, Kip1) (CDKN1B), mRNA.                                | Hs.238990 | NM_004064 |
| -1.240 | MCM6   | minichromosome maintenance complex component 6 (MCM6), mRNA.                                    | Hs.444118 | NM_005915 |
| -1.250 | PLK1   | polo-like kinase 1 ( <i>Drosophila</i> ) (PLK1), mRNA.                                          | Hs.592049 | NM_005030 |
| -1.312 | CDKN2C | cyclin-dependent kinase inhibitor 2C (p18, inhibits CDK4) (CDKN2C), transcript variant 2, mRNA. | Hs.525324 | NM_078626 |
| -1.354 | CCNB2  | cyclin B2 (CCNB2), mRNA.                                                                        | Hs.194698 | NM_004701 |
| -1.466 | MCM3   | minichromosome maintenance complex component 3 (MCM3), mRNA.                                    | Hs.179565 | NM_002388 |
| -1.542 | BUB1B  | BUB1 budding uninhibited by benzimidazoles 1 homolog beta (yeast) (BUB1B), mRNA.                | Hs.631699 | NM_001211 |
| -1.853 | CCNA2  | cyclin A2 (CCNA2), mRNA.                                                                        | Hs.58974  | NM_001237 |
| -2.037 | CDC2   | cell division cycle 2, G1 to S and G2 to M (CDC2), transcript variant 2, mRNA.                  | Hs.334562 | NM_033379 |

**B.** Cytokines/Cytokines receptors

| Value  | Gene      | Description                                                                                                                  | UniGene   | RefSeq    |
|--------|-----------|------------------------------------------------------------------------------------------------------------------------------|-----------|-----------|
| -1.144 | KITLG     | KIT ligand (KITLG), transcript variant b, mRNA.                                                                              | Hs.1048   | NM_000899 |
| -1.163 | IL11      | interleukin 11 (IL11), mRNA.                                                                                                 | Hs.467304 | NM_000641 |
| -1.277 | TNFSF4    | tumor necrosis factor (ligand) superfamily, member 4 (tax-transcriptionally activated glycoprotein 1, 34kDa) (TNFSF4), mRNA. | Hs.181097 | NM_003326 |
| -1.360 | CCL2      | chemokine (C-C motif) ligand 2 (CCL2), mRNA.                                                                                 | Hs.303649 | NM_002982 |
| -1.436 | PDGFRA    | platelet-derived growth factor receptor, alpha polypeptide (PDGFRA), mRNA.                                                   | Hs.74615  | NM_006206 |
| -1.458 | TNFRSF11B | tumor necrosis factor receptor superfamily, member 11b (osteoprotegerin) (TNFRSF11B), mRNA.                                  | Hs.81791  | NM_002546 |
| -1.577 | TGFBR1    | transforming growth factor, beta receptor I (activin A receptor type II-like kinase, 53kDa) (TGFBR1), mRNA.                  | Hs.494622 | NM_004612 |
| -1.676 | IL1R1     | interleukin 1 receptor, type I (IL1R1), mRNA.                                                                                | Hs.701982 | NM_000877 |

|        |          |                                                                                                             |           |           |
|--------|----------|-------------------------------------------------------------------------------------------------------------|-----------|-----------|
| -1.750 | TGFBR1   | transforming growth factor, beta receptor I (activin A receptor type II-like kinase, 53kDa) (TGFBR1), mRNA. | Hs.494622 | NM_004612 |
| -1.991 | TNFRSF19 | tumor necrosis factor receptor superfamily, member 19 (TNFRSF19), transcript variant 2, mRNA.               | Hs.149168 | NM_148957 |
|        |          |                                                                                                             |           |           |

### C. DNA replication

| Value  | Gene     | Description                                                                        | UniGene   | RefSeq       |
|--------|----------|------------------------------------------------------------------------------------|-----------|--------------|
| -1.037 | POLE     | polymerase (DNA directed), epsilon (POLE), mRNA.                                   | Hs.524871 | NM_006231    |
| -1.052 | RFC2     | replication factor C (activator 1) 2, 40kDa (RFC2), transcript variant 2, mRNA.    | Hs.647062 | NM_002914    |
| -1.094 | MCM4     | minichromosome maintenance complex component 4 (MCM4), transcript variant 2, mRNA. | Hs.460184 | NM_182746    |
| -1.110 | RNASEH2B | ribonuclease H2, subunit B (RNASEH2B), mRNA.                                       | Hs.306291 | NM_024570    |
| -1.134 | POLA1    | polymerase (DNA directed), alpha 1 (POLA1), mRNA.                                  | Hs.567319 | NM_016937    |
| -1.189 | DNA2     | DNA replication helicase 2 homolog (yeast) (DNA2), mRNA.                           | Hs.532446 | NM_001080449 |
| -1.240 | MCM6     | minichromosome maintenance complex component 6 (MCM6), mRNA.                       | Hs.444118 | NM_005915    |
| -1.359 | PRIM1    | primase, DNA, polypeptide 1 (49kDa) (PRIM1), mRNA.                                 | Hs.534339 | NM_000946    |
| -1.438 | RFC4     | replication factor C (activator 1) 4, 37kDa (RFC4), transcript variant 2, mRNA.    | Hs.518475 | NM_181573    |
| -1.466 | MCM3     | minichromosome maintenance complex component 3 (MCM3), mRNA.                       | Hs.179565 | NM_002388    |
