# Supplementary figures and images for: WNT16B Is a New Marker of Cellular Senescence That Regulates p53 Activity and the Phosphoinositide 3-Kinase/AKT Pathway
Source: Oxford University Press journal article supplement (doi:10.1158/0008-5472.can-09-1016), 2009-12-01

Figure S5

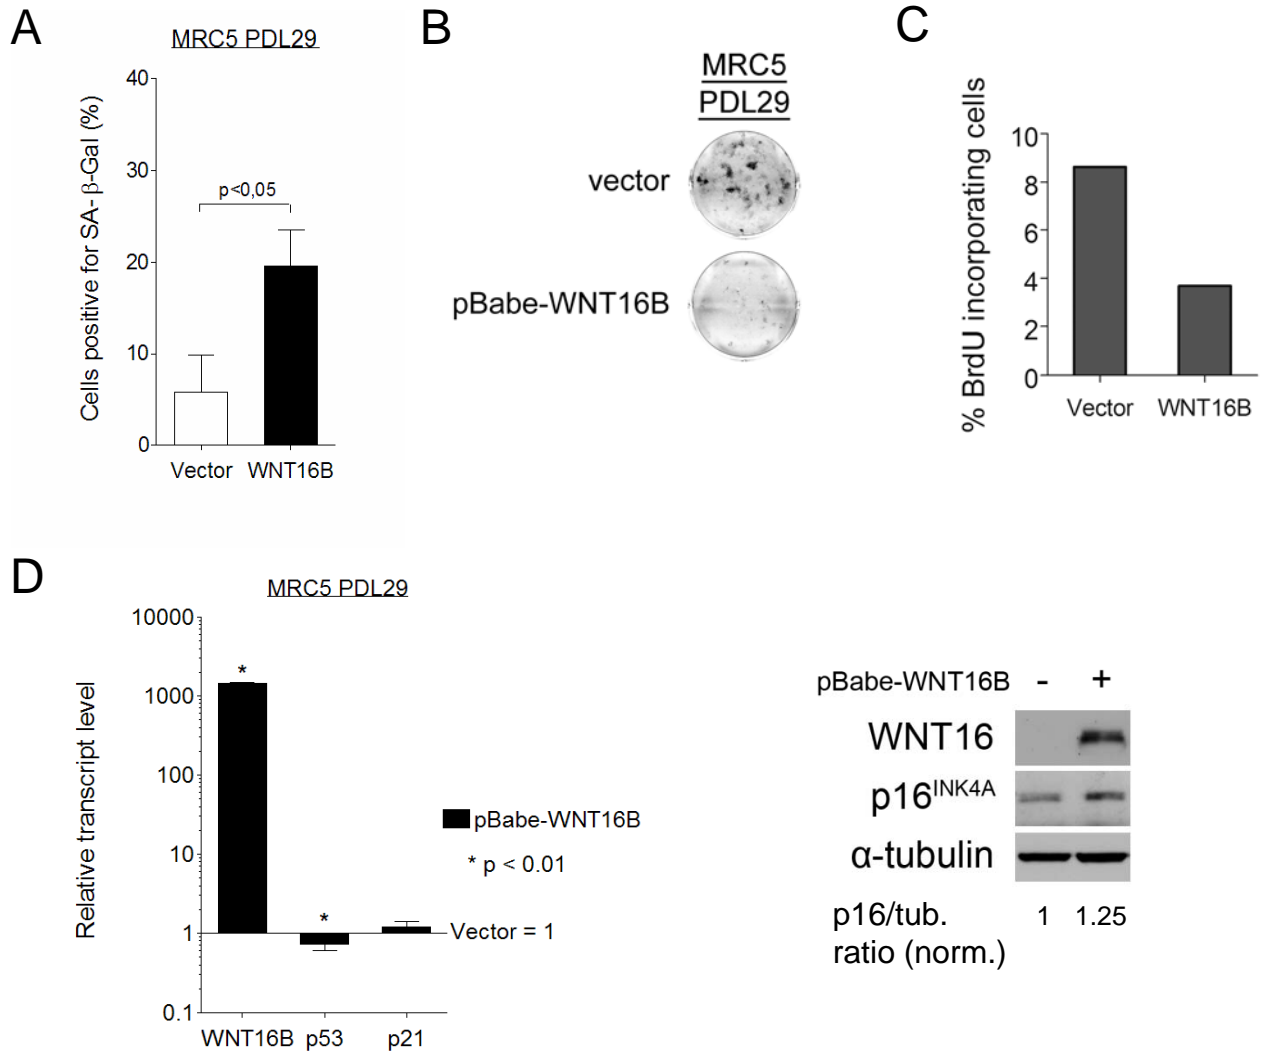

Supplement: 00085472can091016-sup-fig_5.pdf [file 00085472can091016-sup-fig_5.pdf]

Figure S4

A

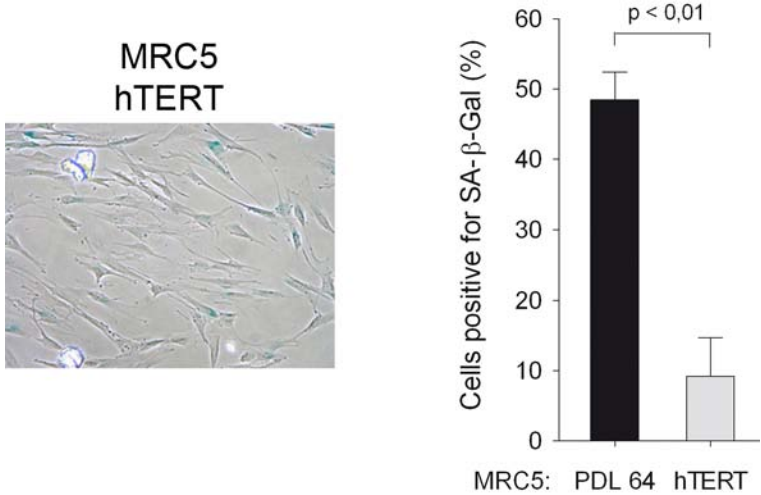

B

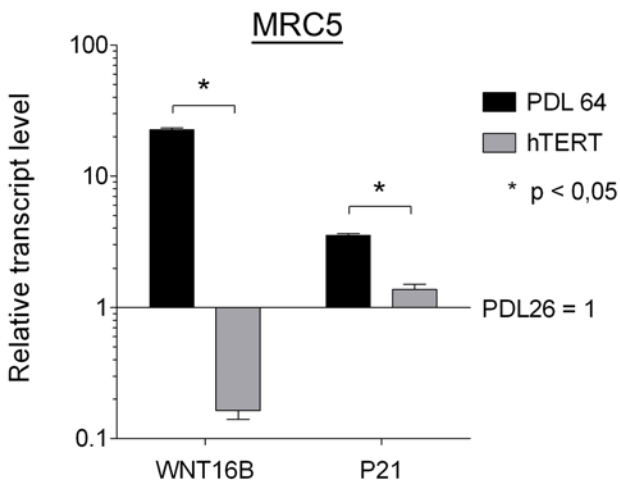

C

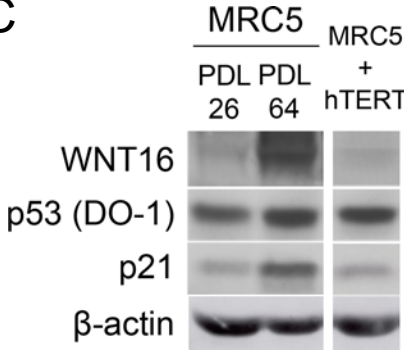

Supplement: 00085472can091016-sup-sfig_4.pdf [file 00085472can091016-sup-sfig_4.pdf]
